# Supplementary material for: High pH-induced efficient room-temperature phosphorescence from carbon dots in hydrogen-bonded matrices
Source: Royal Society of Chemistry journal article supplement (doi:10.1039/c8tc02012d), 2018-01-01
Supplement: c8tc02012d1.pdf [file c8tc02012d1.pdf]

## Supporting Information

# High pH-induced efficient room-temperature phosphorescence from carbon dots in hydrogen-bonded matrices

*Jing Tan,<sup>\*ab</sup> Yunxia Ye,<sup>ab</sup> Xudong Ren,<sup>a</sup> Wei Zhao,<sup>c</sup> and Dongmei Yue<sup>\*d</sup>*

<sup>a</sup> School of Mechanical Engineering, Jiangsu University, Zhenjiang 212013, PR China.

<sup>b</sup> Institute of Micro-nano Optoelectronics and Terahertz Technology, Jiangsu University, Zhenjiang 212013, PR China.

<sup>c</sup> Technology and Engineering Center for Space Utilization, Chinese Academy of Sciences, Beijing, 100094, PR China.

<sup>d</sup> State Key Laboratory of Organic-Inorganic Composites, Beijing University of Chemical Technology, Beijing 100029, China.

\*E-mail: tanjing0916@163.com and yuedm@mail.buct.edu.cn

**Materials.**

All reagents were used as received without further purification. Folic acid, anhydrous citric acid, cyanuric acid and sodium hydroxide (NaOH) were purchased from Aladdin Chemistry Co. Ltd, China. Deionized (DI) water (18.2 M $\Omega$ .cm at 25 °C) prepared by a Milli-Q (MQ) water system was used throughout all experiments.

**Characterization.**

The transmission electron microscopy (TEM) and high-resolution TEM (HRTEM) images were recorded on a H800 instrument (Hitachi, Japan) and a HRTEM JEOL 2100 system operating at 200 kV (Japan), respectively. The X-ray photoelectron spectroscopy (XPS) measurement was performed by using an ESCALAB 250 XPS system (Thermo Electron Corporation, USA). The Fourier transform infrared (FTIR) spectrum was collected on a Bruker Tensor 27 spectrophotometer (Germany). The PL and phosphorescence spectra of CDs and CD-based composites were acquired by using a Hitachi F-7000 fluorescence spectrophotometer (Japan). The absorbance spectra of CDs and CD-based composites was recorded by using a Shimadzu UV-2600 spectrometer (Japan). The absolute PL QY, fluorescence lifetime, and time-resolved phosphorescence lifetimes were measured using an Edinburgh FLS980 fluorescence spectrophotometer (UK). The absolute phosphorescence QY of CD-based RTP composites were obtained on Edinburgh FLS980 spectrometer equipped with an integrating sphere using BaSO<sub>4</sub> as the reflectance standard at room temperature. The excitation light source is a microsecond flash-lamp ( $\mu$ F900) equipped with a gating.

The gating time is 100 ns.

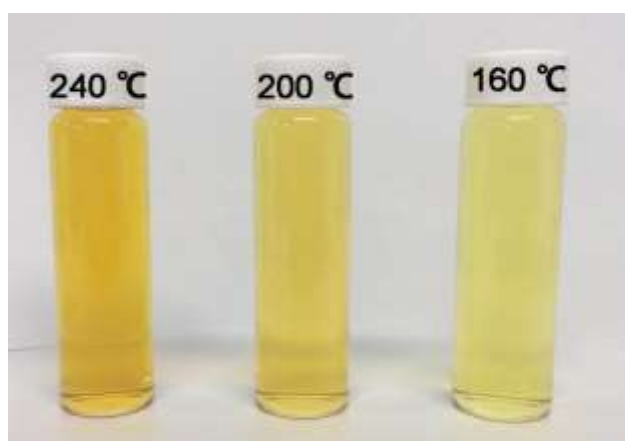

Fig. S1 Digital photographs of the products at different reaction temperature.

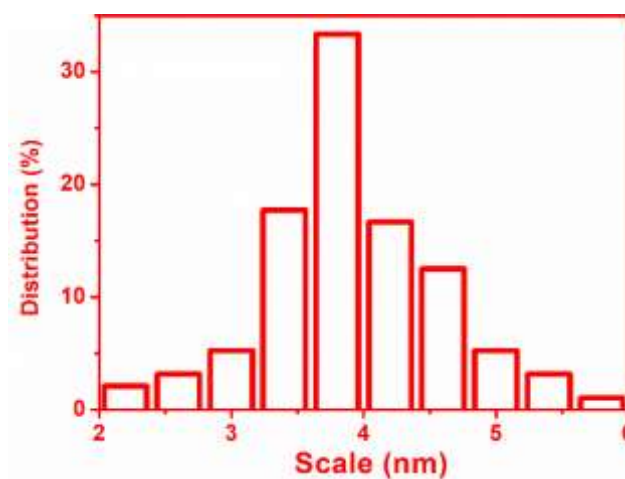

Fig. S2 Particle diameter distribution of CDs.

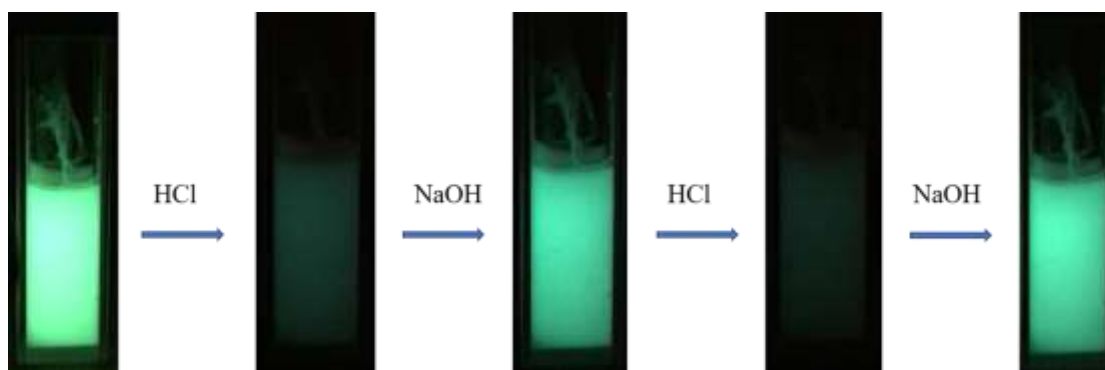

**Fig. S3** Photographs of the RTP intensity for the CD/H<sub>2</sub>CANa<sub>11.5</sub> composites under alternate treatment of HCl and NaOH.

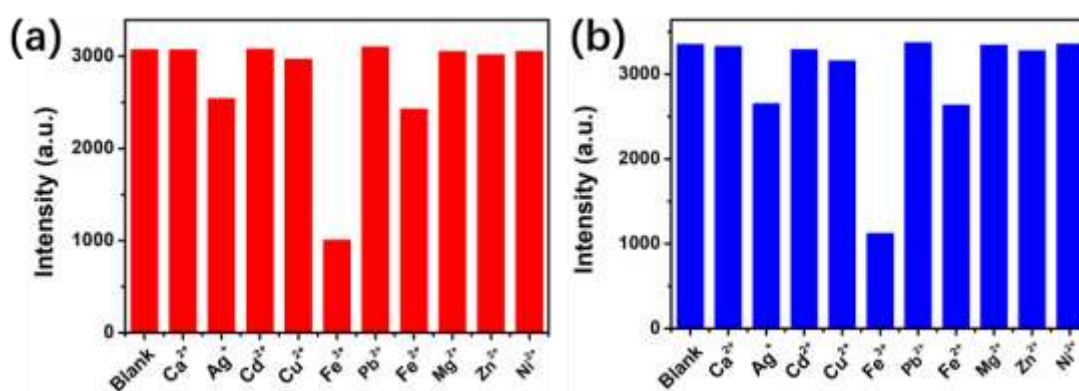

**Fig. S4** Comparison of a) PL and b) RTP intensities of the CD/H<sub>2</sub>CANa<sub>7.3</sub> composites after adding different metal ions (PL:  $\lambda_{\text{ex}} = 380$  nm,  $\lambda_{\text{em}} = 438$  nm; RTP:  $\lambda_{\text{ex}} = 360$  nm,  $\lambda_{\text{em}} = 480$  nm).

**Table S1** The time resolved phosphorescence decay components ( $\lambda_{\text{ex}} = 377.4$  nm and  $\lambda_{\text{em}} = 470$  nm) of the CDs in different pH values. Where  $\alpha_i$ ,  $\tau_i$  are the amplitude and decay time (ns)<sup>a</sup>.

| pH   | $\tau_1$ [ns] | A <sub>1</sub> [%] | $\tau_2$ [ns] | A <sub>2</sub> [%] | T <sub>3</sub> [ns] | A <sub>3</sub> [%] | $\tau_{\text{ave}}$ [ns] |
|------|---------------|--------------------|---------------|--------------------|---------------------|--------------------|--------------------------|
| 4.8  | 1.508         | 17.32              | 4.648         | 53.45              | 13.84               | 29.24              | 10.00376                 |
| 5.8  | 1.087         | 8.54               | 3.954         | 53.16              | 12.39               | 38.3               | 9.683821                 |
| 7.3  | 1.028         | 25.66              | 4.008         | 38.68              | 12.4                | 35.66              | 9.832643                 |
| 10.0 | 1.534         | 12.19              | 4.37          | 40.47              | 12.66               | 47.34              | 10.5538                  |
| 11.5 | 4.648         | 13.08              | 10.86         | 86.92              | --                  | --                 | 10.48412                 |
| 12.3 | 3.724         | 12.38              | 9.128         | 87.62              | --                  | --                 | 8.833471                 |

<sup>a</sup> The average lifetimes were calculated using the equation:  $\tau_{\text{ave}} = \sum \alpha_i \tau_i^2 / \sum \alpha_i \tau_i$
